# Supplementary material
Source: publisher figshare collection journal article supplement (https://geolsoc.figshare.com/articles/dataset/_/3453089)
Supplement: Supplementary file 2 [file 1]

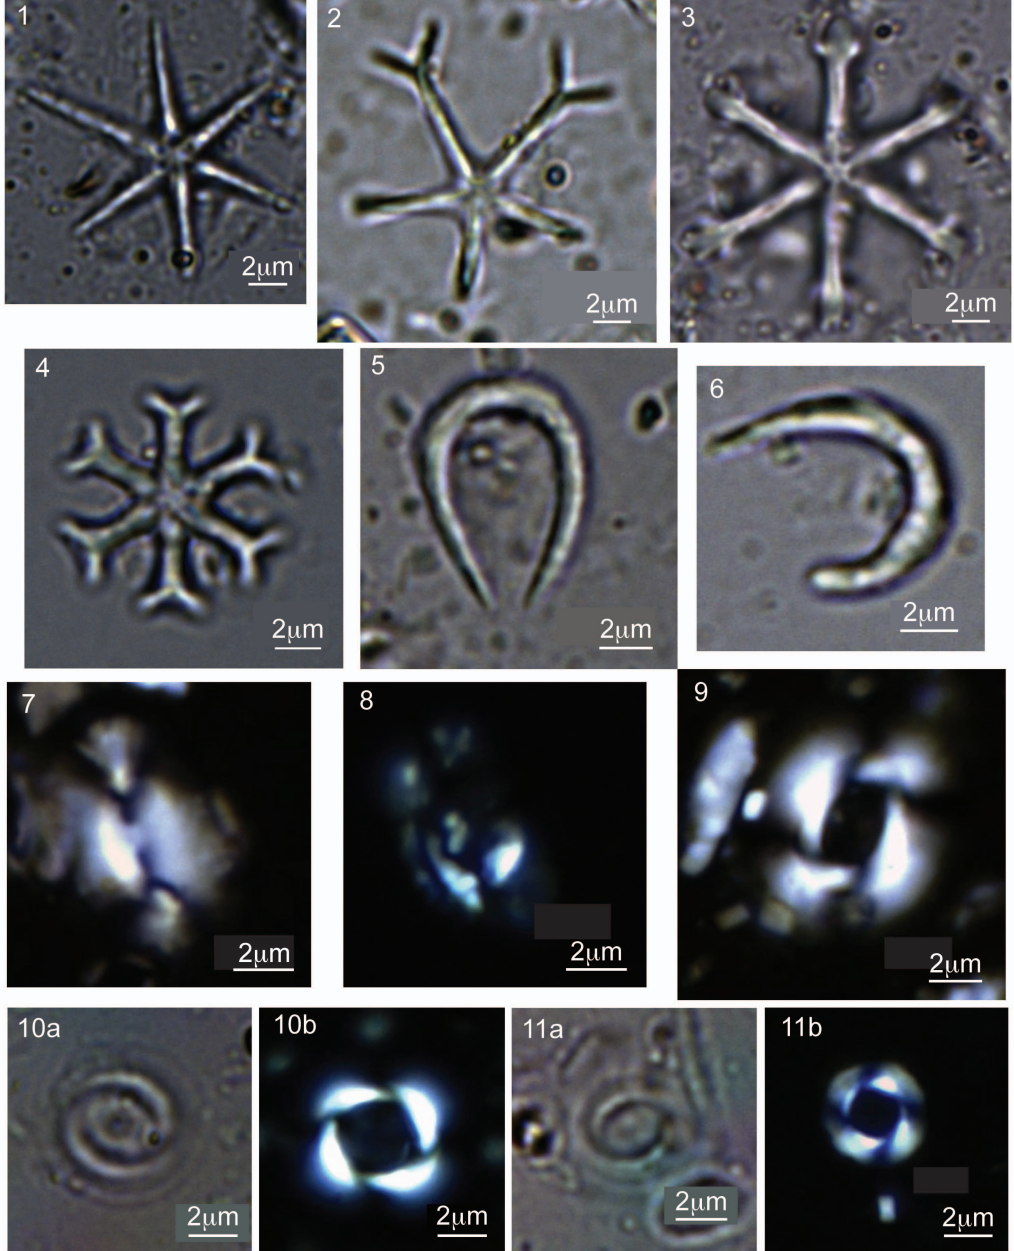

**Appendix 4.** Selected species of nannofossils recovered from the Avadan composite section. **1.** *Discoaster brouwerii* Tan 1927, emended, Bramlette & Riedel, 1954, sample AVA-1 2; **2.** *Discoaster pentaradiatus* Tan, 1927, sample AVA-1 1; **3.** *Discoaster surculus* Martini & Bramlette, 1963, sample AVA-1 4; **4.** *Discoaster variabilis* Martini & Bramlette, 1963 sample AVA-1 2; **5.** *Amaurolithus delicatus* Gartner & Bukry, 1975 sample AVA-1 2; **6.** *Amaurolithus primus* (Bukry and Percival, 1971) Gartner and Bukry, 1975, sample AVA-1 5; **7.** *Helicosphaera carteri* (Wallich, 1877) Kamptner, 1954 sample AVA-1 5; **8.** *Helicosphaera intermedia* Martini, 1965, sample AVA-1 2; **9.** *Reticulofenestra pseudoumbilicus* (Gartner, 1967) Gartner, 1969, sample AVA-1 1; **10 – 11** *Reticulofenestra zancleana* Di Stefano & Sturiale, 2010, (a parallel light, b crossed polarized), sample AVA-1 2.
