# Supplementary material
Source: publisher figshare collection journal article supplement (https://geolsoc.figshare.com/articles/dataset/_/3453089)
Supplement: Supplementary file 3 [file 1]

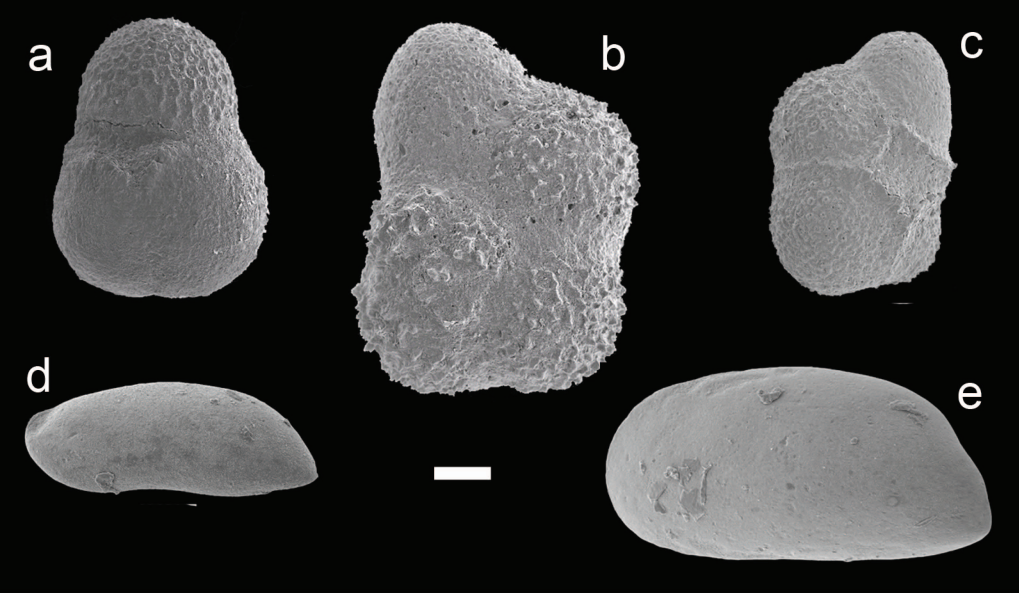

**Appendix 6.** Selected foraminifera and ostracods recovered from the Avadan composite section. **a.** *Sphaeroidinellopsis seminulina*, sample AVA-1 1; **b.** *Sphaeroidinellopsis seminulina*, sample AVA-1 2; **c.** *Sphaeroidinellopsis seminulina*, sample AVA-1 2; **d.** *Argilloecia acuminata*, sample AVA-1 1; **e.** *Krithe compressa*, sample AVA-1 1. White bar corresponds to 0.1 mm.
