# Supplementary material
Source: publisher figshare collection journal article supplement (https://geolsoc.figshare.com/articles/dataset/_/3453089)
Supplement: Supplementary file 4 [file 1]

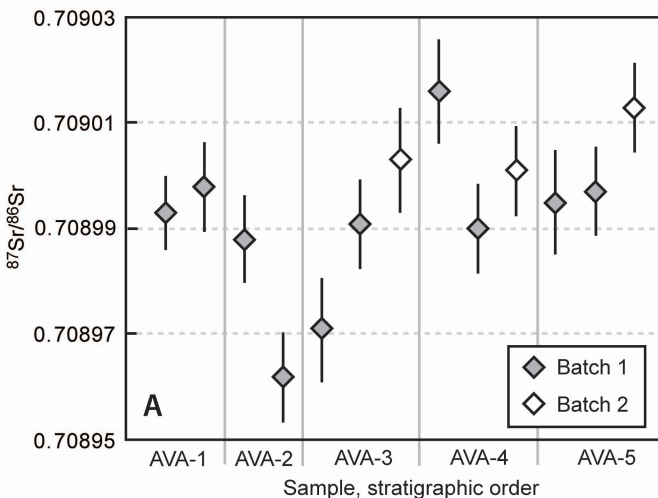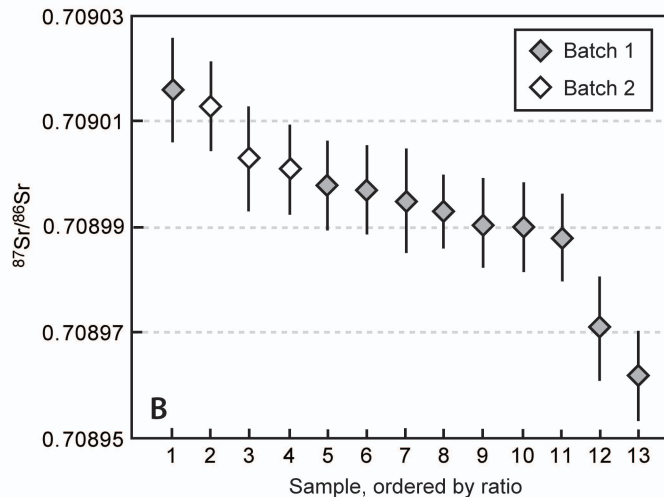

**Appendix 8. A:** Sr isotopic results plotted in stratigraphic order. **B:** Sr isotopic results ordered by  $^{87}\text{Sr}/^{86}\text{Sr}$  value. Error bars on Sr ratios reflect  $2\sigma$  analytical errors.
