# Supplementary material
Source: publisher figshare collection journal article supplement (https://geolsoc.figshare.com/articles/dataset/_/3453089)
Supplement: Supplementary file 5 [file 1]

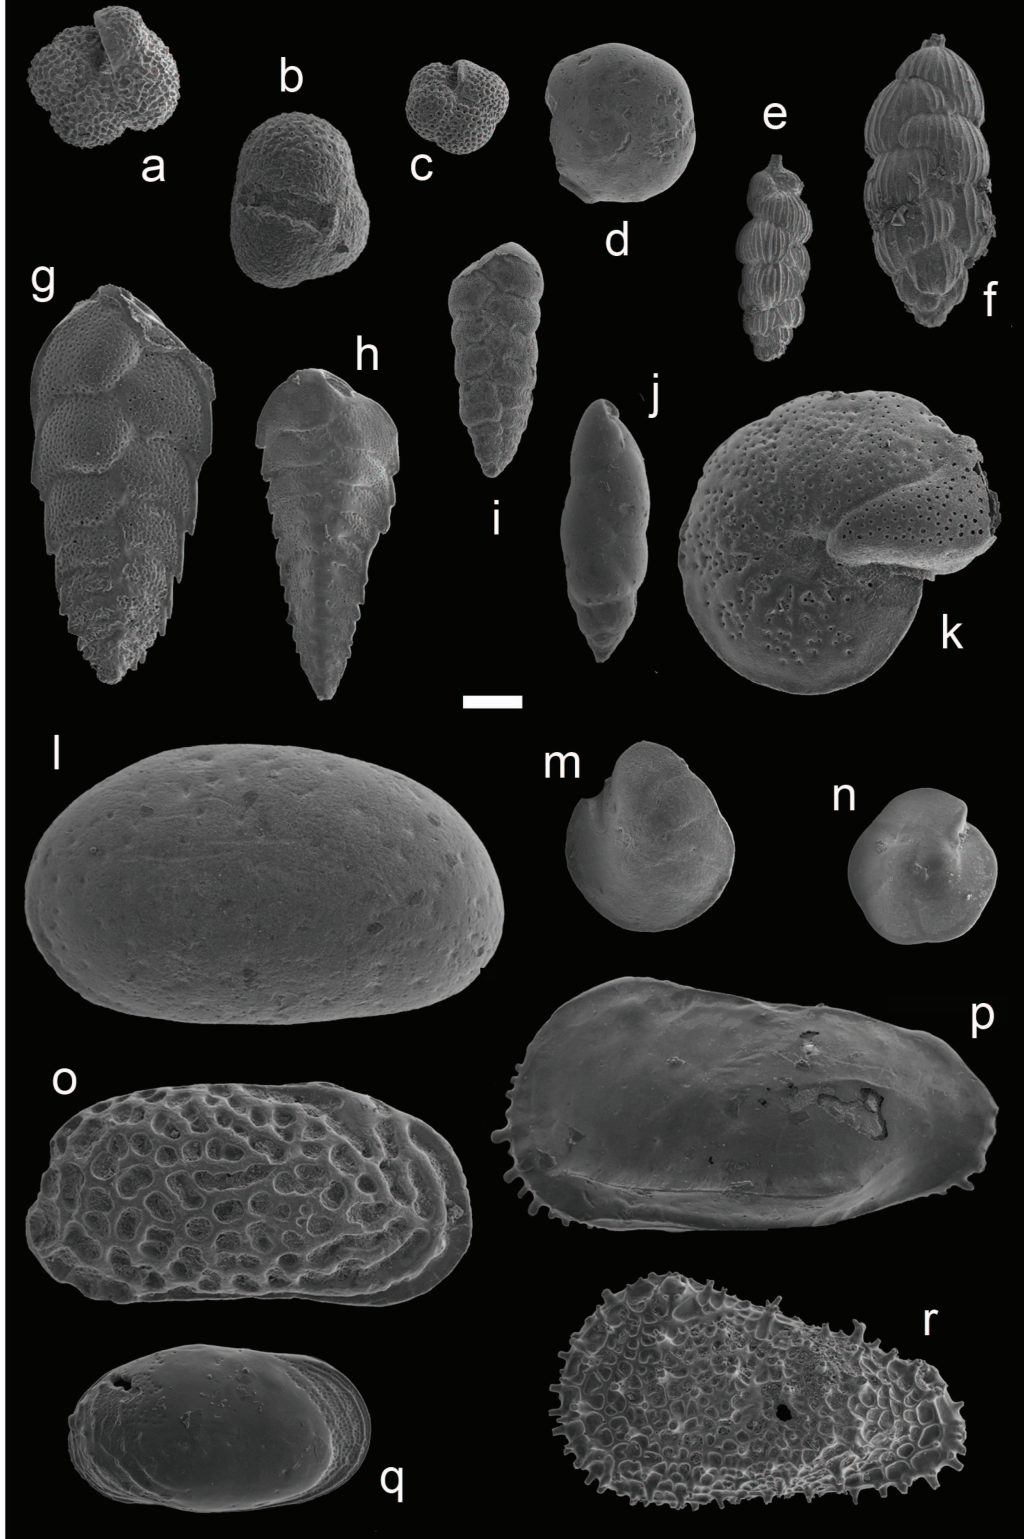

**Appendix 2.** Selected species of foraminifera and ostracods recovered from the T-191 borehole cuttings. **a.** *Neogloboquadrina dutertrei*, sample 110 m; **b.** *Sphaeroidinellopsis seminulina*, sample 220 m; **c.** *Neogloboquadrina acostaensis* dx, sample 220 m; **d.** *Ammonia* sp., sample 90 m; **e.** *Uvigerina* cf. *U. pygmaea*, sample 150 m; **f.** *Uvigerina bononiensis*, sample 150 m; **g.** *Bolivina alata*, sample 150 m; **h.** *Bolivina spathulata*, sample 150 m; **i.** *Bolivina punctata*, sample 150 m; **j.** *Bulimina exilis*, sample 150 m; **k.** *Cibicidoides ungerianus*, sample 190 m; **l.** *Cyprideis agrigentina*, sample 230 m; **m.** *Cibicidoides kullenbergi*, sample 190 m; **n.** *Oridorsalis umbonatus*, sample 190 m; **o.** *Urocythereis exedata*, sample 110 m; **p.** *Ruggieria tetraptera*, sample 110 m; **q.** *Rectobuntonia subulata*, sample 150 m; **r.** *Acanthocythereis hystrix*, sample 110 m. White bar corresponds to 0.1 mm.
